# Supplementary material for: Vector competence of pre-alpine Culicoides (Diptera: Ceratopogonidae) for bluetongue virus serotypes 1, 4 and 8
Source: PubMed Central journal article supplement (PMC6090685; doi:10.1186/s13071-018-3050-y), 2018-08-13

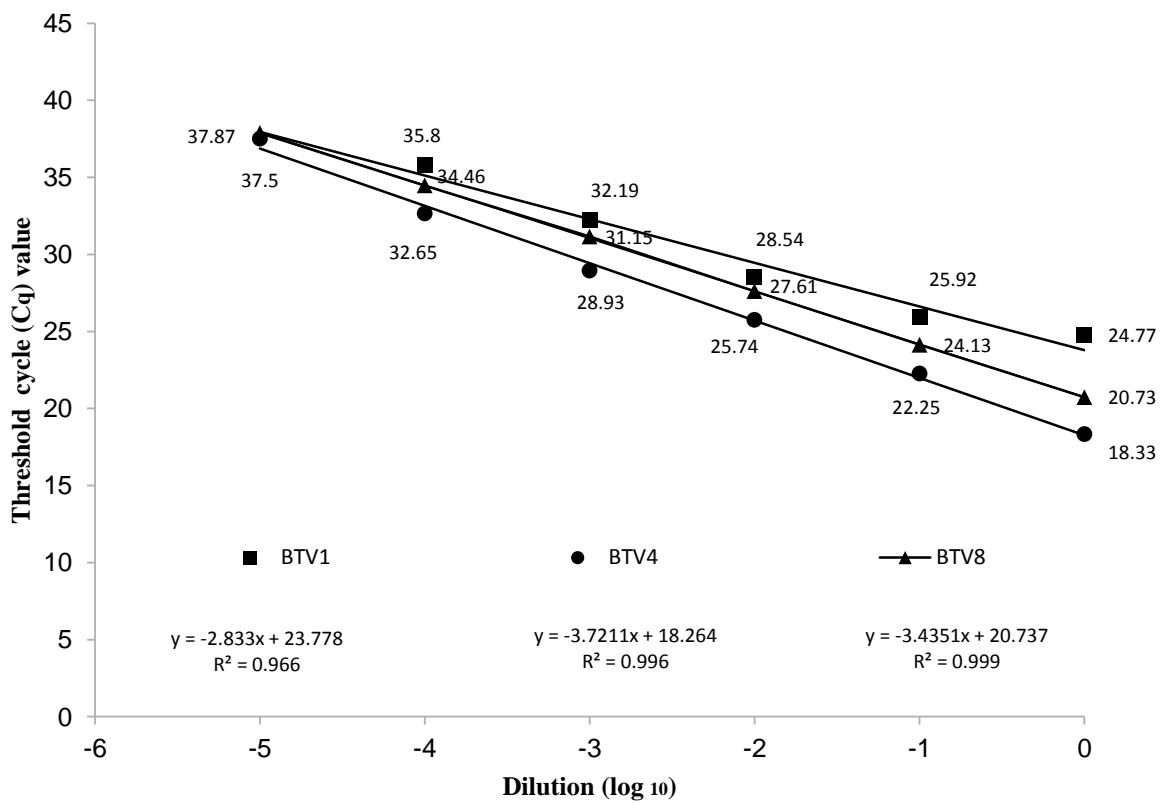

Supplement: 13071_2018_3050_MOESM2_ESM.pdf [file 13071_2018_3050_MOESM2_ESM.pdf]
