# Supplementary material for: Vector competence of pre-alpine Culicoides (Diptera: Ceratopogonidae) for bluetongue virus serotypes 1, 4 and 8
Source: PubMed Central journal article supplement (PMC6090685; doi:10.1186/s13071-018-3050-y), 2018-08-13
Supplement: 13071_2018_3050_MOESM3_ESM.pdf [file 13071_2018_3050_MOESM3_ESM.pdf]

| <b>BTV Strains</b> | <b>Species</b>              | <b>C<sub>q</sub> values</b> |
|--------------------|-----------------------------|-----------------------------|
| <b>BTV-1</b>       | <i>C. scoticus</i>          | 33.2                        |
|                    |                             | 34.8                        |
|                    |                             | 35.4                        |
|                    |                             | 35.4                        |
|                    |                             | 35.5                        |
|                    |                             | 36.5                        |
|                    |                             | 36.6                        |
|                    |                             | 36.6                        |
|                    |                             | 36.8                        |
|                    |                             | 37.0                        |
|                    |                             | 37.1                        |
|                    |                             | 37.2                        |
|                    |                             | 37.2                        |
|                    |                             | 38.1                        |
|                    |                             | 38.6                        |
|                    |                             | 38.6                        |
|                    |                             | 38.7                        |
|                    |                             | 39.1                        |
|                    |                             | 39.4                        |
|                    |                             | 40.1                        |
| 40.6               |                             |                             |
| 40.6               |                             |                             |
| 40.8               |                             |                             |
| 41.0               |                             |                             |
| <b>BTV-1</b>       | <i>C. obsoletus</i>         | 35.7                        |
|                    |                             | 39.6                        |
| <b>BTV-1</b>       | <i>C. pallidicornis</i>     | 39.6                        |
| <b>BTV-1</b>       | <i>C. reconditus</i> - like | 40.2                        |
| <b>BTV-4</b>       | <i>C. scoticus</i>          | 45.4                        |
|                    | <i>C. scoticus</i>          | 48.9                        |
| <b>BTV-8</b>       | <i>C. pallidicornis</i>     | 39.9                        |
|                    | <i>C. obsoletus</i>         | 40.2                        |
|                    | <i>C. obsoletus</i>         | 40.9                        |
